# Supplementary material for: HADC regulates the diabetic vascular endothelial dysfunction by targetting MnSOD
Source: Oxford University Press journal article supplement (doi:10.1042/bsr20181042), 2018-09-16
Supplement: bsr20181042_supp1.pdf [file bsr20181042_supp1.pdf]

## Supplementary Data

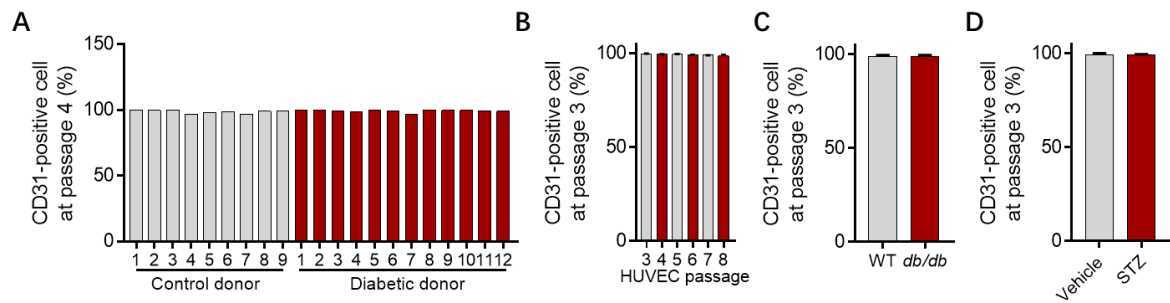

### Supplementary Figure 1 CD31-positive cell of isolated endothelial cells.

- (A) CD31-positive cell at passage 4 of endothelial cells isolated from control and diabetic donors (Related to Figure 1A).
- (B) CD31-positive cell at passage 3-8 of HUVEC used in this study.
- (C) CD31-positive cell at passage 3 of endothelial cells isolated from control and diabetic mice (Related to Figure 1B).
- (D) CD31-positive cell at passage 3 of endothelial cells isolated from control and diabetic mice (Related to Figure 1C).

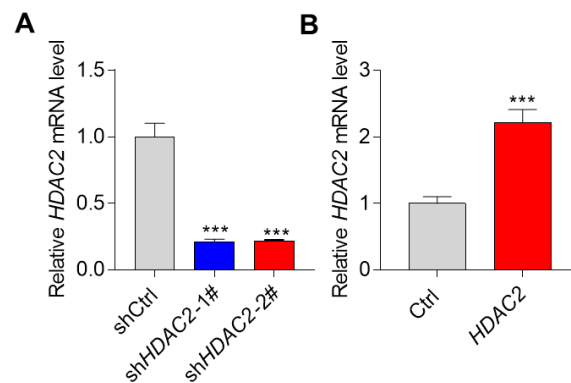

**Supplementary Figure 2 HDAC2 mRNA knockdown and overexpression in HUVEC (Related to Figure 2A and E).** \*\*\* $p < 0.01$  vs. shCtrl or Ctrl by one-way ANOVA followed by Bonferroni *post hoc* multiple comparisons tests or Student's t test.

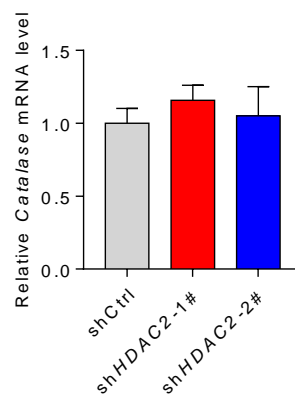

**Supplementary Figure 3 HDAC2 did not change the expression of Catalase.** HUVECs were infected with a retrovirus carrying shRNA targeting HDAC2 for 48 hours, then the

mRNA and protein levels were analyzed.

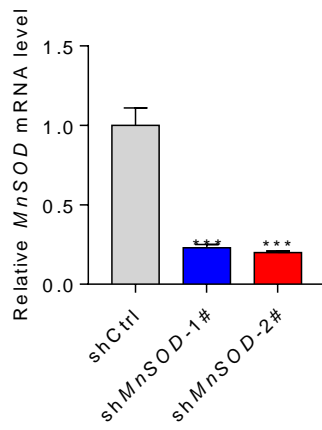

**Supplementary Figure 4 MnSOD mRNA knockdown in HUVEC (Related to Figure 4F).**

\*\*\*  $p < 0.01$  vs. shCtrl by one-way ANOVA followed by Bonferroni *post hoc* multiple comparisons tests.
